# Supplementary material for: Mitigating the prevalence and function of myeloid-derived suppressor cells by redirecting myeloid differentiation using a novel immune modulator
Source: HighWire-hosted journal article supplement (doi:10.1136/jitc-2022-004710), 2022-09-01
Supplement: jitc-2022-004710supp001_data_supplement.pdf [file jitc-2022-004710supp001_data_supplement.pdf]

**Oliver L. et al****Supplementary Table 1.****Flow Cytometry antibodies**

| Antigen                | Clone        | Provider                                     | Ref/Catalog # |
|------------------------|--------------|----------------------------------------------|---------------|
| mouse Ly6G/Ly6C (Gr-1) | RB6-8C5      | Biolegend (San Diego, USA)                   | 108409        |
| mouse B220             | RA3-6B2      | Biolegend (San Diego, USA)                   | 103247        |
| mouse B220             | RA3-6B2      | eBioscience (San Diego, USA)                 | RM2601        |
| mouse CD11c            | N418         | Biolegend (San Diego, USA)                   | 117313        |
| mouse CD115            | AFS98        | eBioscience (San Diego, USA)                 | 117-1152-82   |
| mouse CD117 (c-kit)    | 2B8          | eBioscience (San Diego, USA)                 | 47-1171-82    |
| mouse CD150            | TC15-12F12.2 | Biolegend (San Diego, USA)                   | 115927        |
| mouse CD16/32          | 93           | eBioscience (San Diego, USA)                 | 45-0161-80    |
| mouse CD4              | GK1.5        | Biolegend (San Diego, USA)                   | 100425        |
| mouse CD40             | 3/23         | Biolegend (San Diego, USA)                   | 124613        |
| mouse F4/80            | BM8          | Biolegend (San Diego, USA)                   | 123119        |
| mouse Ly6A/E (Sca-1)   | D7           | eBioscience (San Diego, USA)                 | 25-5981-81    |
| mouse Ly6C             | HK1.4        | Biolegend (San Diego, USA)                   | 128024        |
| mouse Ly6G             | 1A8          | BD Bioscience (New Jersey, USA)              | 551461        |
| mouse MHC-II           | M5/114.15.2  | Biolegend (San Diego, USA)                   | 107617        |
| mouse Ter119           | TER-119      | eBioscience (San Diego, USA)                 | 11-5921-85    |
| mouse/human CD11b      | M1/70        | eBioscience (San Diego, USA)                 | 563168        |
| mouse/human IRF8       | REA516       | Miltenyi Biotec (Bergisch Gladbach, Germany) | 130-108-196   |
| mouse/human PU.1       | 7C2C34       | BioLegend (San Diego, USA)                   | 681305        |
| human CD11b            | ICRF44       | Biolegend (San Diego, USA)                   | 311348        |
| human CD14             | 61D3         | eBioscience (San Diego, USA)                 | 12-0149-42    |
| human CD16             | CB16         | Invitrogen (Waltham, USA)                    | 56-0168-42    |
| human CD66b            | G10F5        | BD Pharmingen (Oxford, UK)                   | 555724        |
| human CD8              | 53-6.7       | Biolegend (San Diego, USA)                   | 100742        |
| human CD8              | RPA-T8       | eBioscience (San Diego, USA)                 | 557086        |
| human HLA-DR           | L243         | Biolegend (San Diego, USA)                   | 307616        |

**Oliver L. et al**  
**Figure S1.**

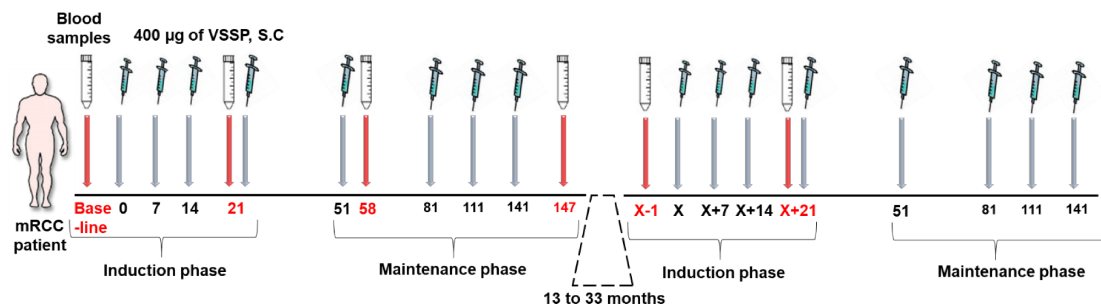

**Supplementary Figure S1. Treatment schedule and peripheral blood analyses in a clinical trial of patients receiving VSSP as a monotherapy.** Briefly, fifteen mRCC patients were treated with VSSP. Eight doses consisting in 400µg of VSSP were administrated subcutaneously during an Induction Phase and a Maintenance Phase. Seven patients after a period of 13 to 33 months received a second cycle of treatment using the same schedule. Blood samples were taken on days -7 (D0) as baseline, 21, 58 and 147 (first cycle), and on baseline D(X) and day 21 D(X+21) (second cycle).

Oliver L. et al  
Figure S2.

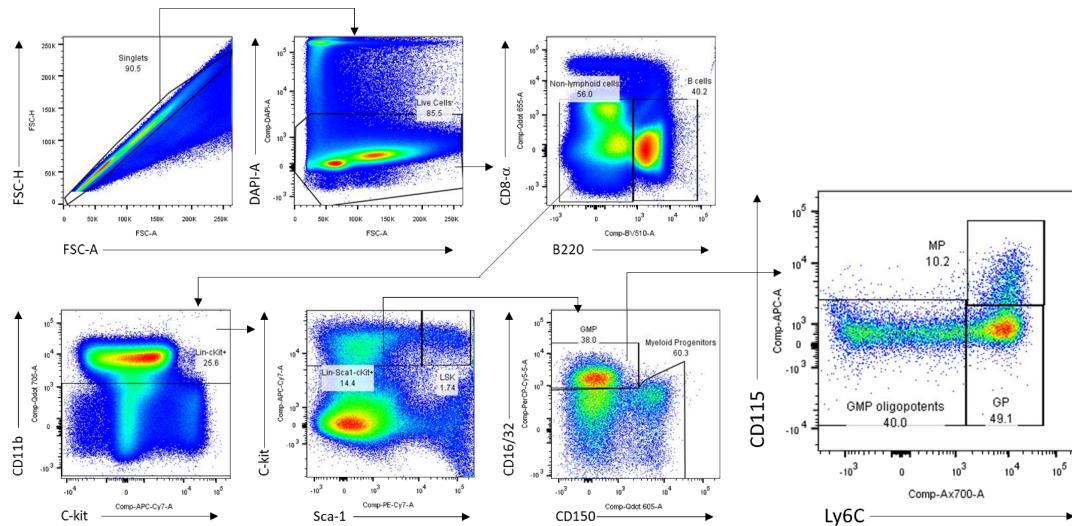

**Supplementary Figure S2. Evaluation of myeloid progenitor populations in a model of emergency myelopoiesis.** Figure shows a representative flow cytometry gating strategy used for the evaluation of myeloid progenitor populations in the BM. Arrows indicate the gated population analyzed in the pseudo color dot plot upper plot by the one below

Oliver L. et al  
Figure S3.

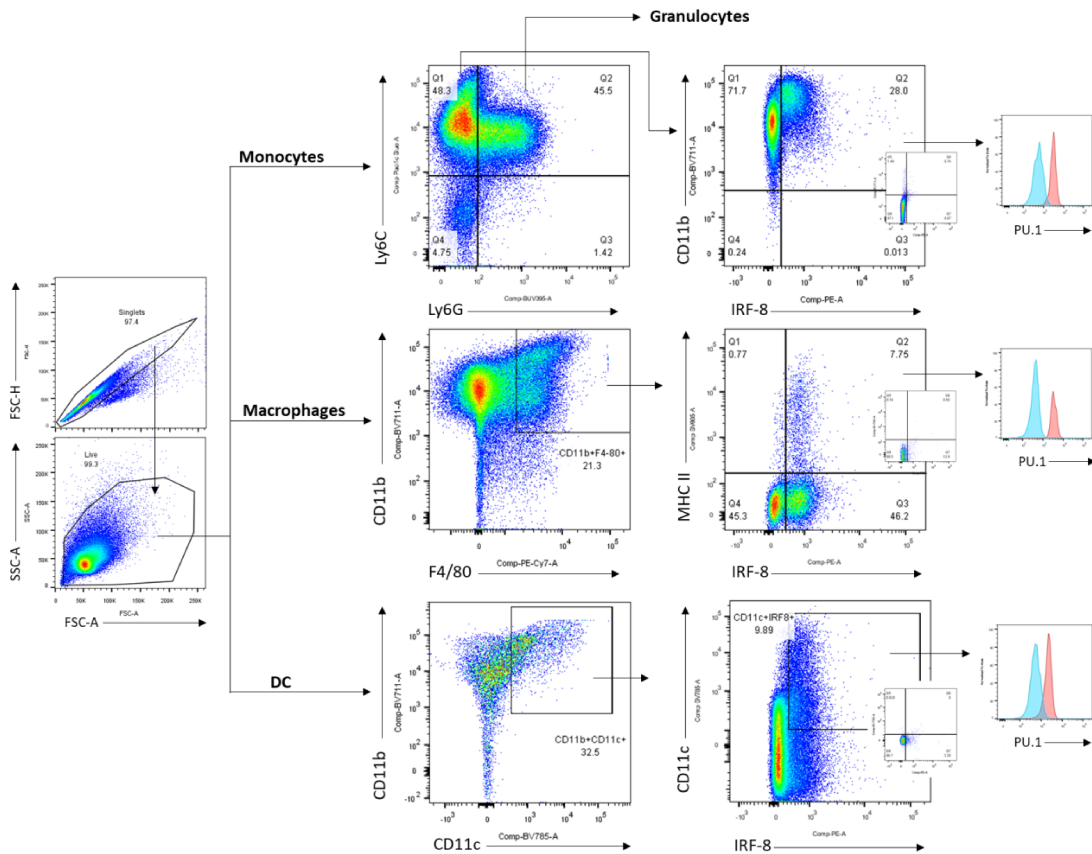

**Supplementary Figure S3. Representative flow cytometry gating strategy for the evaluation of the differentiated cells and the expression of IRF8 and PU.1.** Arrows indicate the gated population analyzed in the pseudo-color dot plot. Monocytes were defined as CD11b<sup>+</sup>Ly6C<sup>hi</sup>Ly6G<sup>-</sup> population, while granulocytic cells were defined by Ly6G<sup>+</sup> expression. Frequencies of macrophages were calculated from the intersection of the CD11b<sup>+</sup>, F4/80<sup>+</sup> and MHC-II<sup>+</sup> markers and DCs from the CD11b<sup>+</sup>, CD11c<sup>+</sup> and MHC-II<sup>+</sup> markers. Percentages of IRF8<sup>+</sup> cells and IRF8 and PU.1-double positive cells were calculated from these defined monocytes, macrophage, and DCs populations. The small inserted dot plots correspond to staining with the appropriate isotype control Ab for IRF8, and the histograms represent those cells positive for PU.1 (red) relative to the isotype control (blue).



Oliver L. et al  
Figure S4.

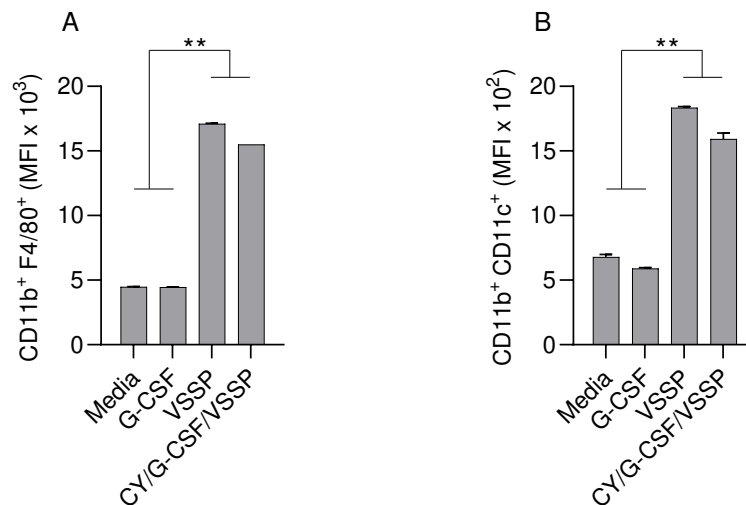

**Supplementary Figure S4. VSSP enhances surface expression of APC markers on MPs.**

Total MPs were sorted from the BM of CY-treated mice (200 mg/kg body weight, i.p.) on day 2 ( $\geq 90\%$  purity) and cultured *in vitro* with SCF (50 ng/ml), IL-3 (10 ng/ml), G-CSF (10 ng/ml); or VSSP (10  $\mu$ g/ml); or both VSSP and G-CSF for 4 days. The expression of prototypic APC markers was measured on macrophages (CD11b<sup>+</sup>F4/80<sup>+</sup>) (A) and DCs (CD11b<sup>+</sup>CD11c<sup>+</sup>) (B), after the indicated treatments by flow cytometry and represented by MFI values. Statistically significant differences were detected by the Tukey test. Data are expressed as mean  $\pm$  SEM and are representative of two experiments with similar results.

Oliver L. et al  
Figure S5.

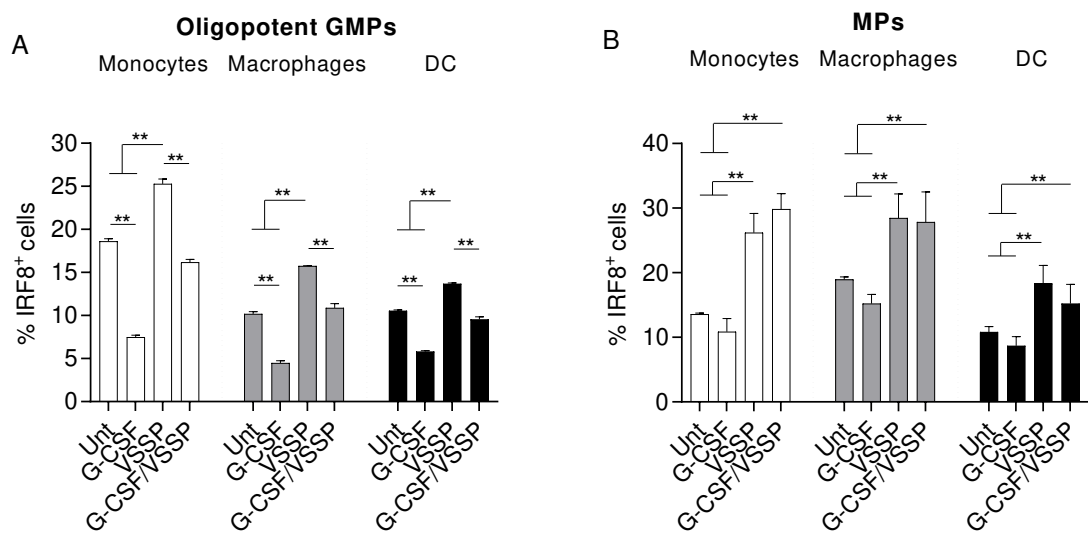

**Supplementary Figure S5. VSSP enhances the expression of IRF8 on APC differentiated from GMP populations during emergency myelopoiesis.** Oligopotent GMPs (A) and MPs (B) were sorted from the BM and treated *in vitro* as described. The percentage of monocytes (CD11b<sup>+</sup>Ly6Ch<sup>i</sup>Ly6G<sup>-</sup>) (white bars), macrophages (CD11b<sup>+</sup>F4/80<sup>+</sup>MHCII<sup>+</sup>) (grey bars), and DCs (CD11b<sup>+</sup>CD11c<sup>+</sup>MHCII<sup>+</sup>), (black bars) positive for IRF8 was measured after the indicated treatments by flow analysis. Data represent the mean ± SEM from multiple replicates of one of two representative experiments. Statistical analyses were performed using the Tukey test.

Oliver L. et al  
Figure S6.

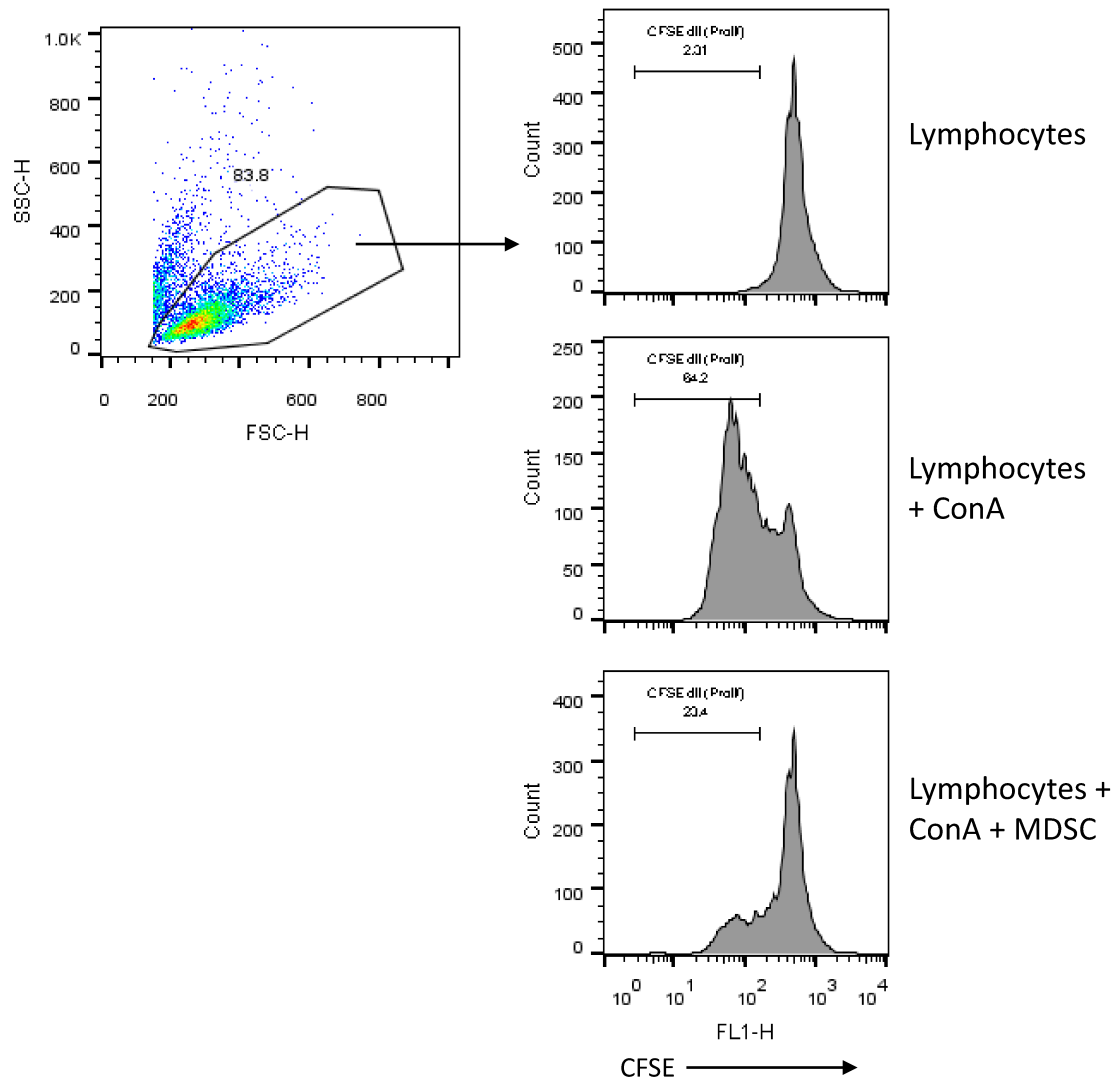

**Supplement Figure S6. Representative flow cytometry analysis for the evaluation of the suppressive capacity of murine CD11b<sup>+</sup> cells.** Naive splenocytes were stimulated with Con A for 96 hours and inhibition of lymphocytes proliferation by the presence of either *in vivo*-isolated or *in vitro*-treated CD11b<sup>+</sup> cells was assessed by CFSE dye dilution.

**Oliver L. et al**  
**Figure S7.**

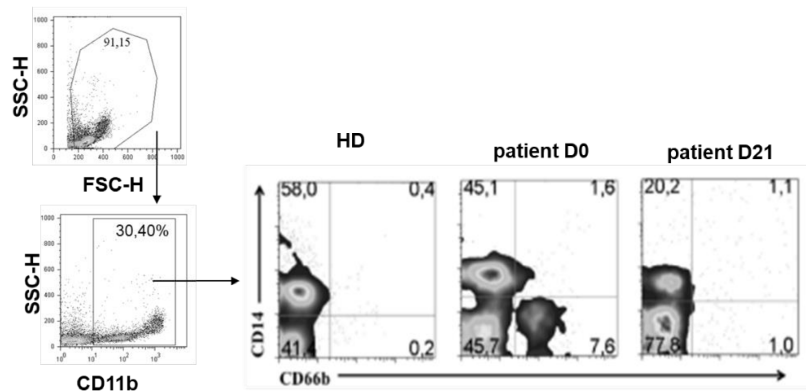

**Supplementary Figure S7. PMN-MDSC phenotype analysis by flow.** Flow cytometry analysis of PMN-MDSCs (CD11b<sup>+</sup>CD66b<sup>+</sup>CD14<sup>-</sup>) from a representative mRCC patient and a healthy donor, at baseline and day 21 after treatment.

**Oliver L. et al**  
**Figure S8.**

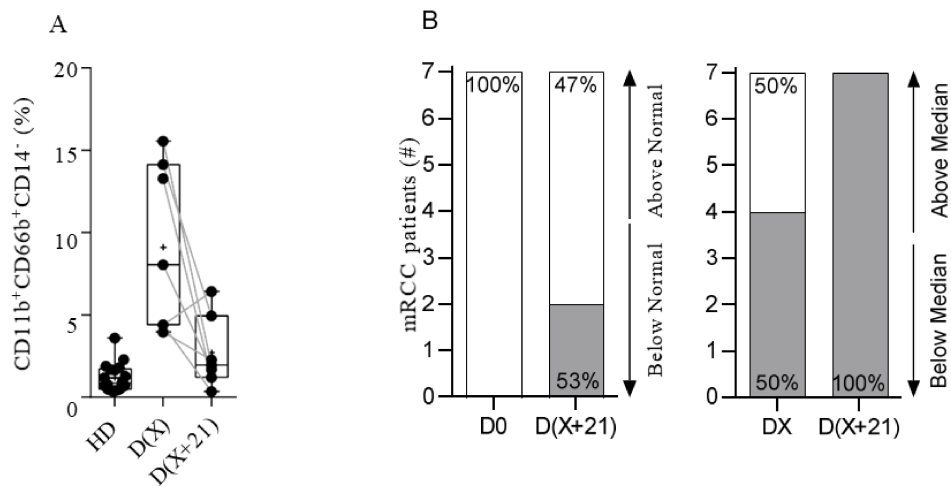

**Supplementary Figure S8. Metastatic RCC patients treated with VSSP have reduced frequencies of circulating PMN-MDSCs after a second cycle of treatment.** Freshly isolated PBMCs of mRCC patients enrolled for the second treatment were analyzed by flow cytometry to determine the frequency of PMN-MDSCs (CD11b<sup>+</sup> CD66b<sup>+</sup> CD14<sup>-</sup>) (A). Data indicate the number of mRCC patients with PMN-MDSCs above and below the normal value (D0) or median values corresponding to baseline at the time of second treatment (DX) on the days after second cycle, D(X+21) (B). Normal values were considered those under the upper 95% confidence interval of healthy donors reflecting the same immunophenotype used to define PMN-MDSCs in patients. Statistical analyses were performed via Kruskal-Wallis and Dunn's tests ( $p < 0.05$ ).

Oliver L. et al  
Figure S9.

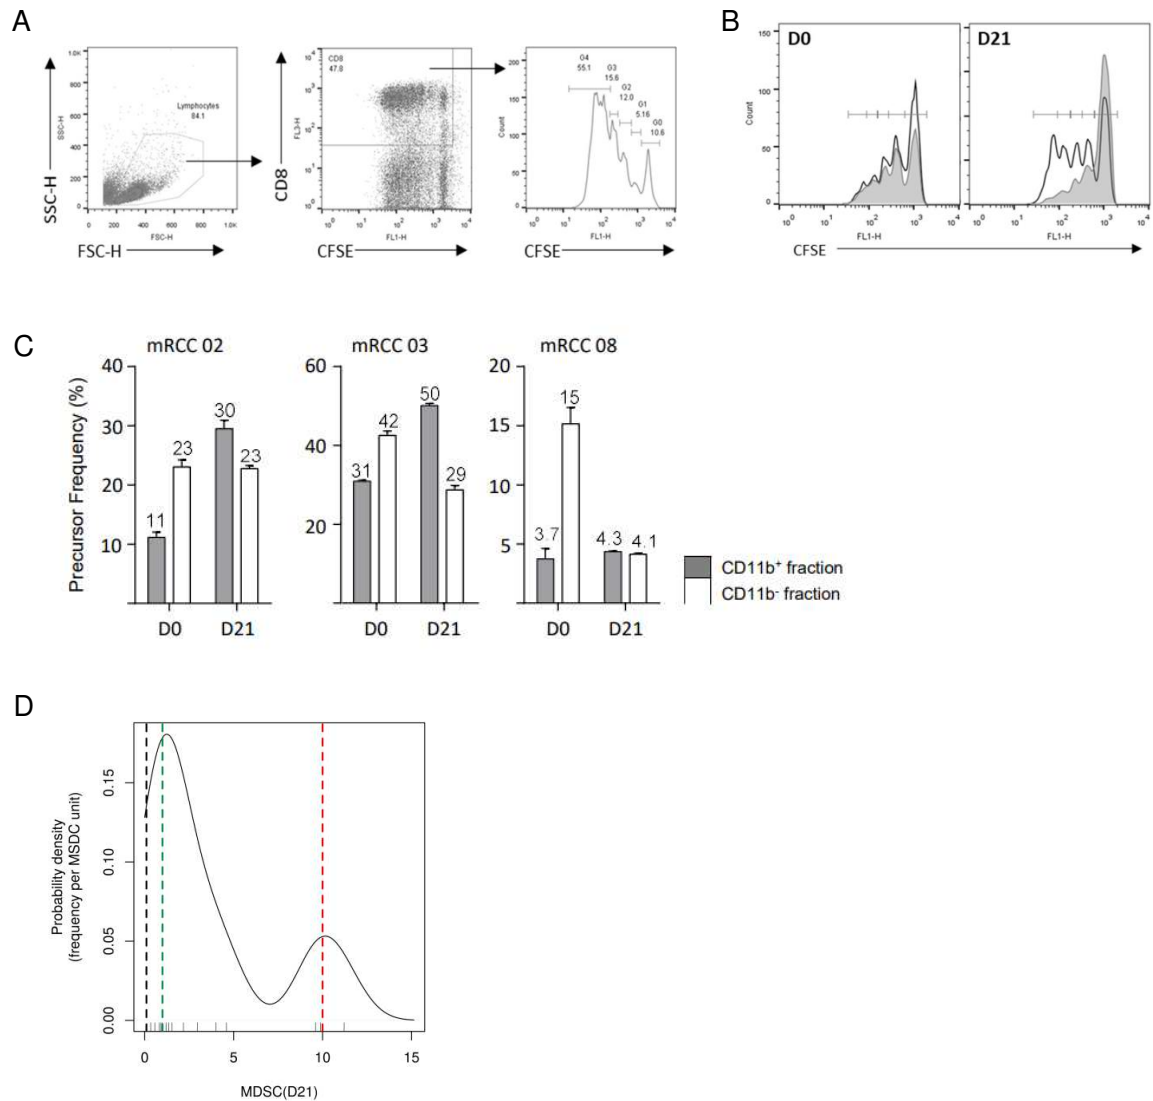

**Supplementary Figure S9. PMN-MDSC functional analysis.** PBMCs from mRCC patients were first depleted or not of CD11b<sup>+</sup> cells, then pre-strained with CFSE followed by stimulation with anti-CD3 antibody for 96 hours. Proliferation of CD8<sup>+</sup> T cells was evaluated based on precursor frequency. Panel **A** represents the gating strategy and CFSE dilution analysis as a measure of the proliferation rounds of CD8<sup>+</sup> T lymphocytes. In addition, Panel **B** shows representative histograms of CD8<sup>+</sup> T cells proliferation from the CD11b<sup>+</sup> (grey filled) or CD11b<sup>-</sup> (open) fractions from PBMCs of a representative patient corresponding to baseline (D0) and day 21 (D21) of treatment. Precursor frequency of the proliferative CD8 T cells of three individual patients are also represented in bars (**C**). In order to associate predicted survival and PMN-MDSC levels following VSSP treatment a Density plot of the observed MDSC levels at day 21 was performed. The levels of 0.1, 1 and 10 are indicated with dashed lines (**D**).
